# Supplementary material for: Diet High in Soybean Oil Increases Susceptibility to Colitis in Mice
Source: bioRxiv or medRxiv preprint supplement (doi:10.1101/2021.02.08.430328), 2022-08-30
Supplement: Supplementary file [file media-1.pdf]

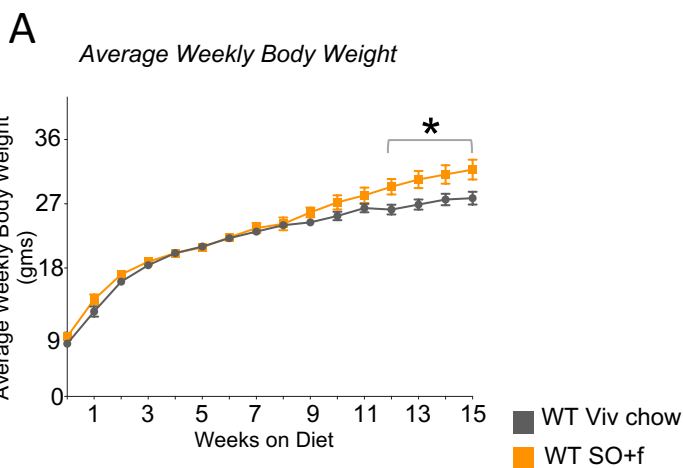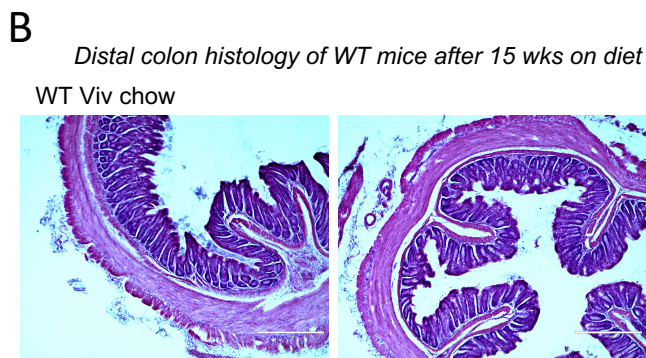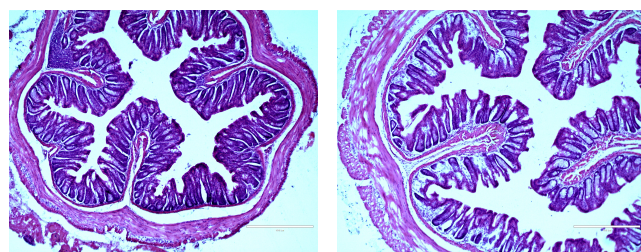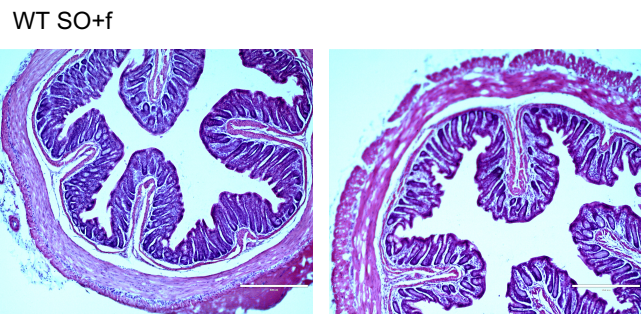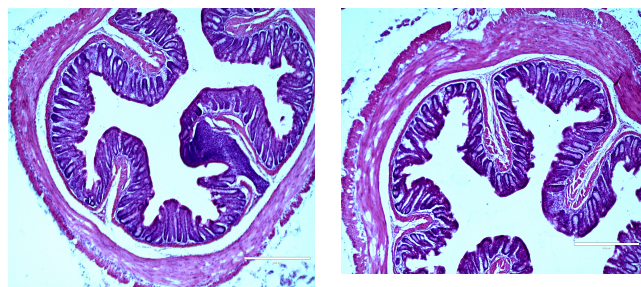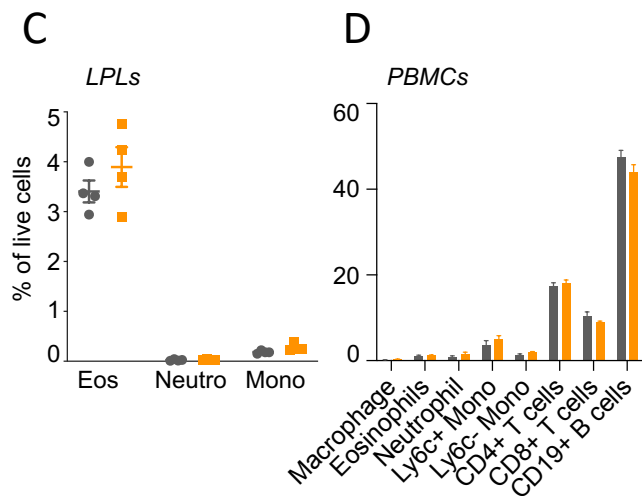

**E** Distal colon histology of with DSS-treated mice, 15 wks on diet

WT Viv chow

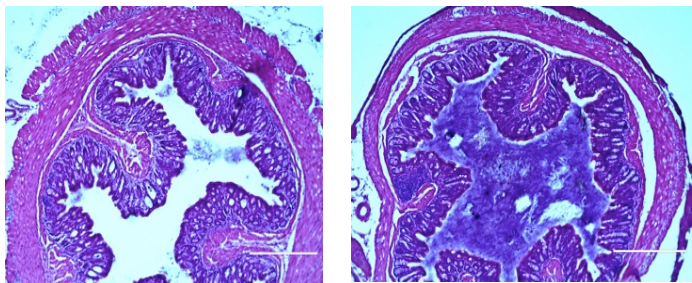

WT SO+f

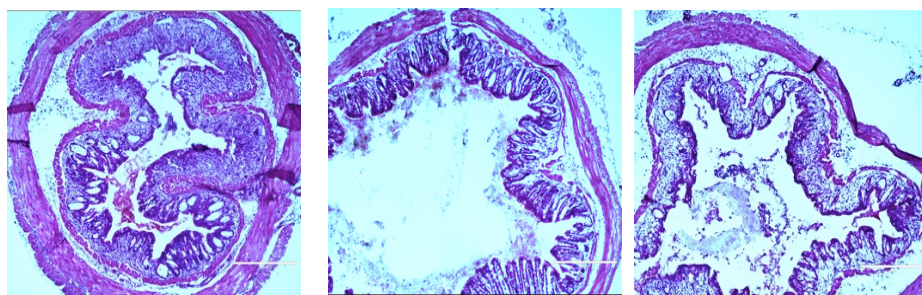

**Supplementary Figure 1. Effect of soybean oil diet on DSS-induced colitis in WT male mice.** Weekly body weights (A), colonic histology (B), immune cell analysis of lamina propria lymphocytes (LPLs, C) and PBMCs (D) in WT mice after 15 weeks on Viv chow or SO+f diet. \* $P < 0.05$ , T-test.  $N=3-8$  per group. Colonic histology (E) in WT mice after 15 weeks on diet followed by 6-day DSS treatment. Scale bar for is 100  $\mu\text{m}$ , images taken at 10x magnification (C,E).

**A**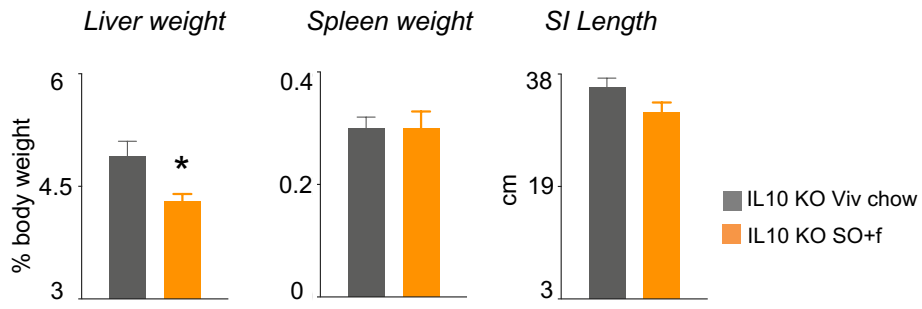**B***Distal colon histology*

IL10 KO Viv chow

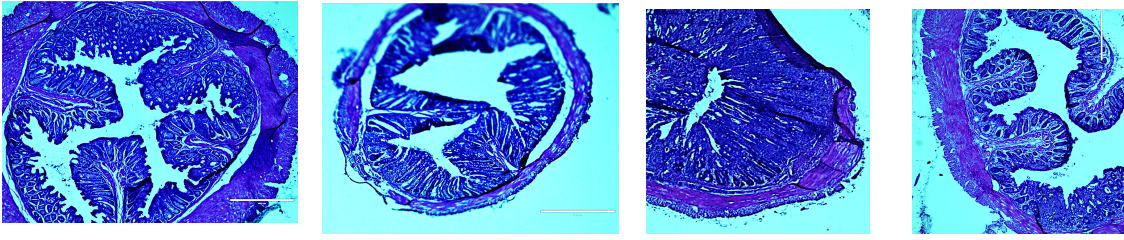

IL10 KO SO+f

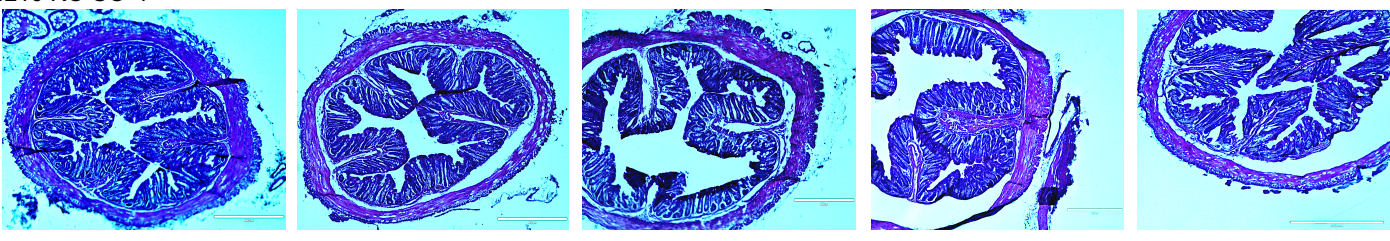**Supplementary Figure 2. Effect of soybean oil diet on IL10 deficient male mice.**

Liver and spleen weights as percent of body weight and small intestinal length (A) and colonic histology (B) in IL10 KO mice after 10 weeks on Viv chow and SO+f diet. Scale bar for is 100  $\mu$ m, images taken at 10x magnification. \*  $P < 0.05$  vs other diet, T-test. N=5-12 per group.

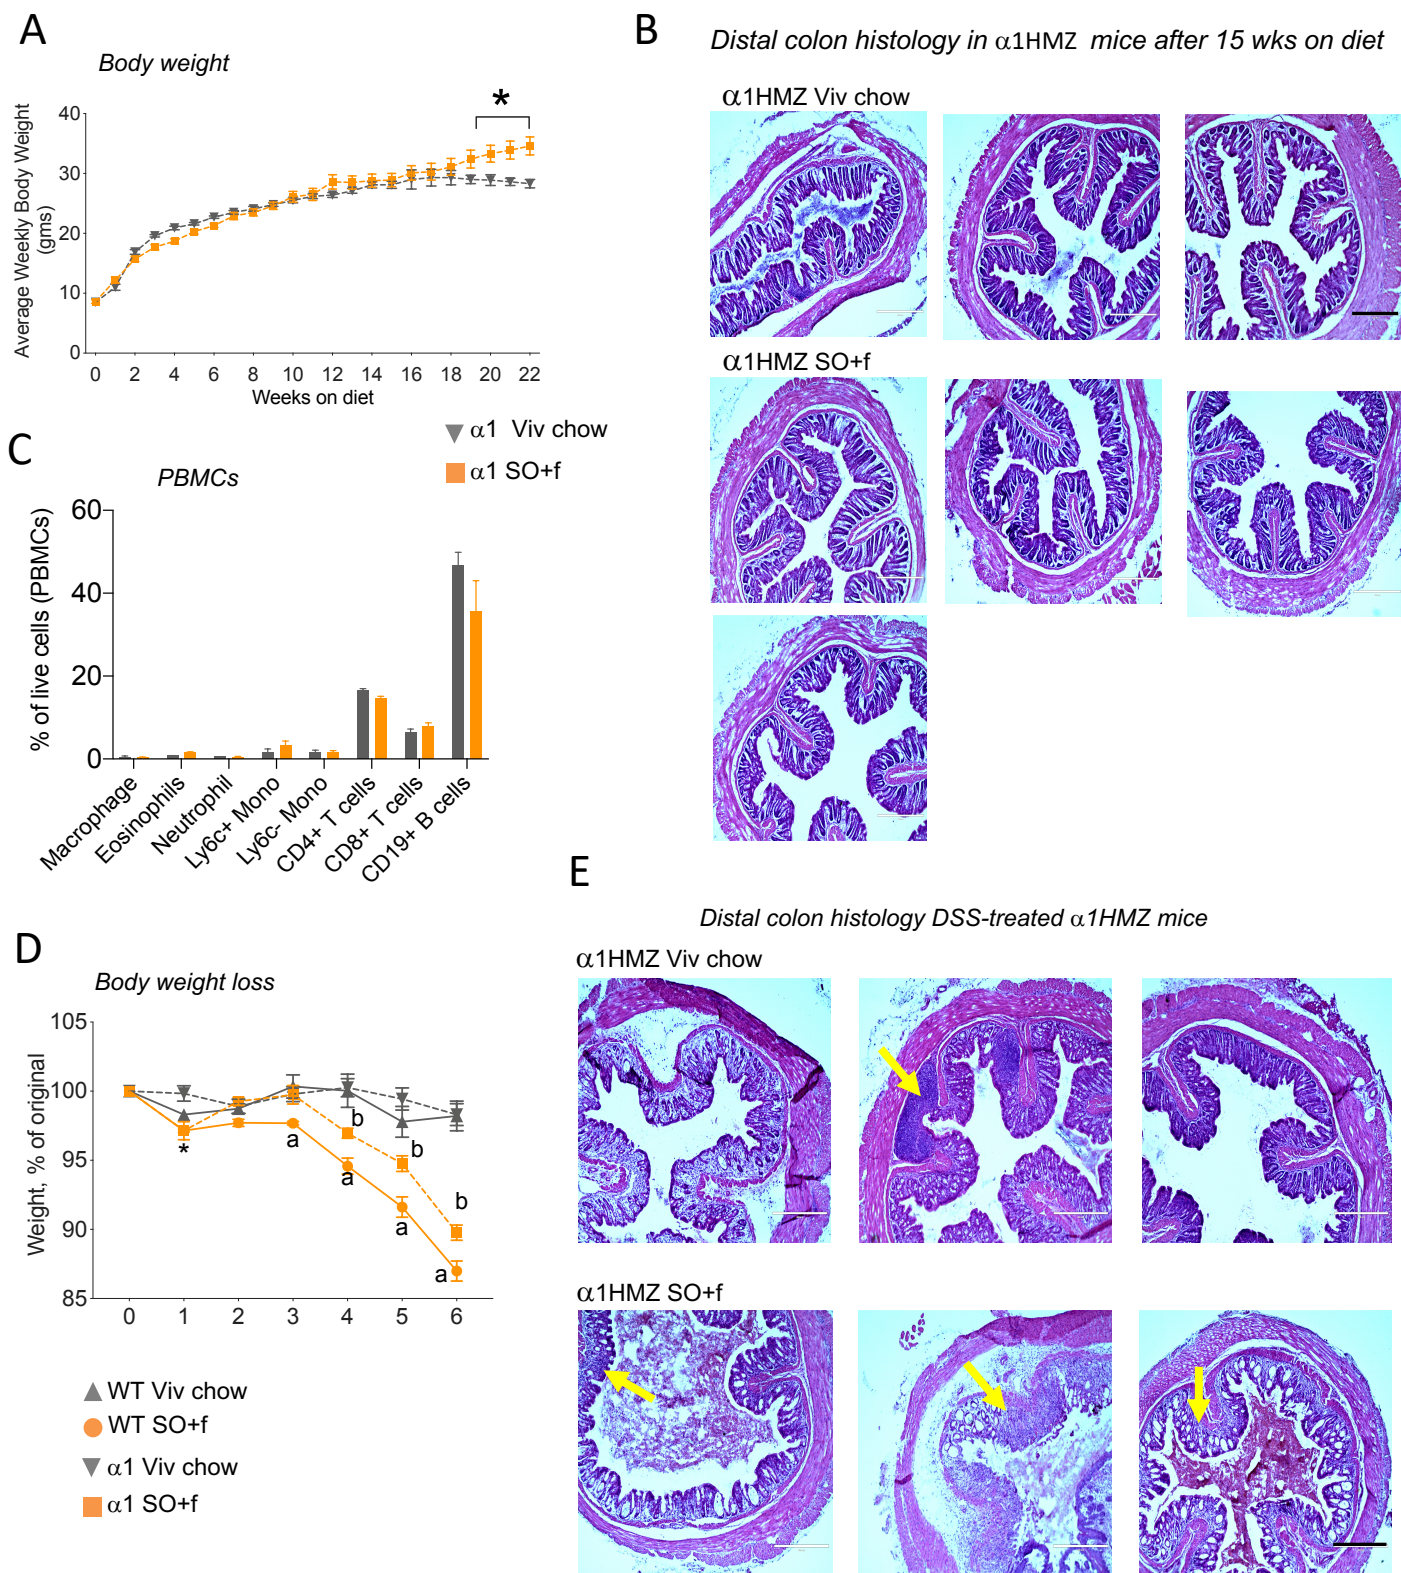

**Supplementary Figure 3. Effect of soybean oil diet on DSS-induced colitis in  $\alpha 1$ HMZ male mice.**

Weekly body weights up to 22 weeks on diet (A), colonic histology (B) and immune analysis in peripheral blood mononuclear cells (PBMCs) after 15 weeks on diet in  $\alpha 1$ HMZ mice (C). D) Comparison of % body weight loss between WT and  $\alpha 1$ HMZ mice on Viv chow or SO+f for 15 weeks, treated with 2.5% DSS in drinking water for 6 days (same data as in Fig. 1A and 2A). \*  $\alpha 1$ HMZ SO+f vs  $\alpha 1$ HMZ Viv, <sup>a</sup> WT SO+f vs WT Viv, <sup>b</sup>  $\alpha 1$ HMZ SO+f vs WT SO+f;  $P < 0.05$  vs other diet, repeated measures 2-way ANOVA, Tukey's post-hoc. N=3-4 per group E) Colonic histology in  $\alpha 1$ HMZ mice after 15 weeks on diet followed by 6-day DSS treatment. Arrow: immune cell infiltrate.

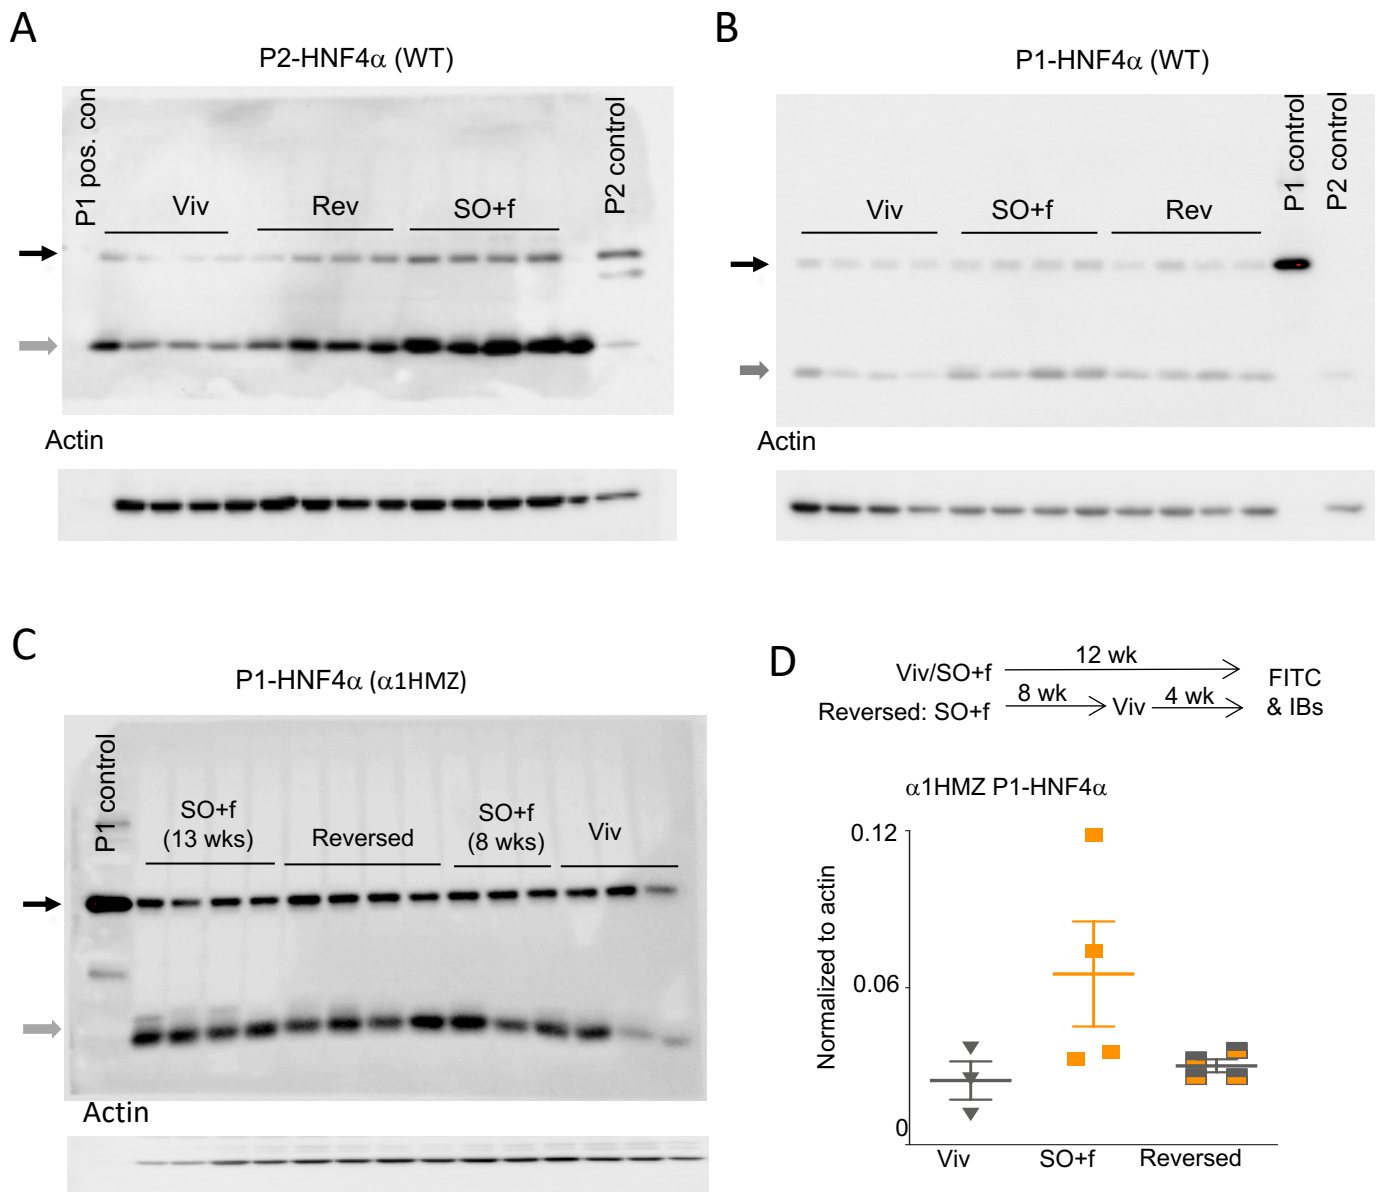

**Supplementary Figure 4. Effect of soybean oil diet on HNF4 $\alpha$  isoform balance in the colon. A-C)** HNF4 $\alpha$  immunoblots (quantification shown in Figure 2F). P1 control-nuclear extract from HCT116 cells expressing P1-HNF4 $\alpha$  ; P2 control-nuclear extract from  $\alpha$ 7HMZ mouse. Black arrow: HNF4 $\alpha$ ; Gray arrow: non-specific band. **D)** Quantification of the P1-HNF4 $\alpha$  signal normalized to total protein, as determined by actin staining of the same blot. N=3-4 per group.

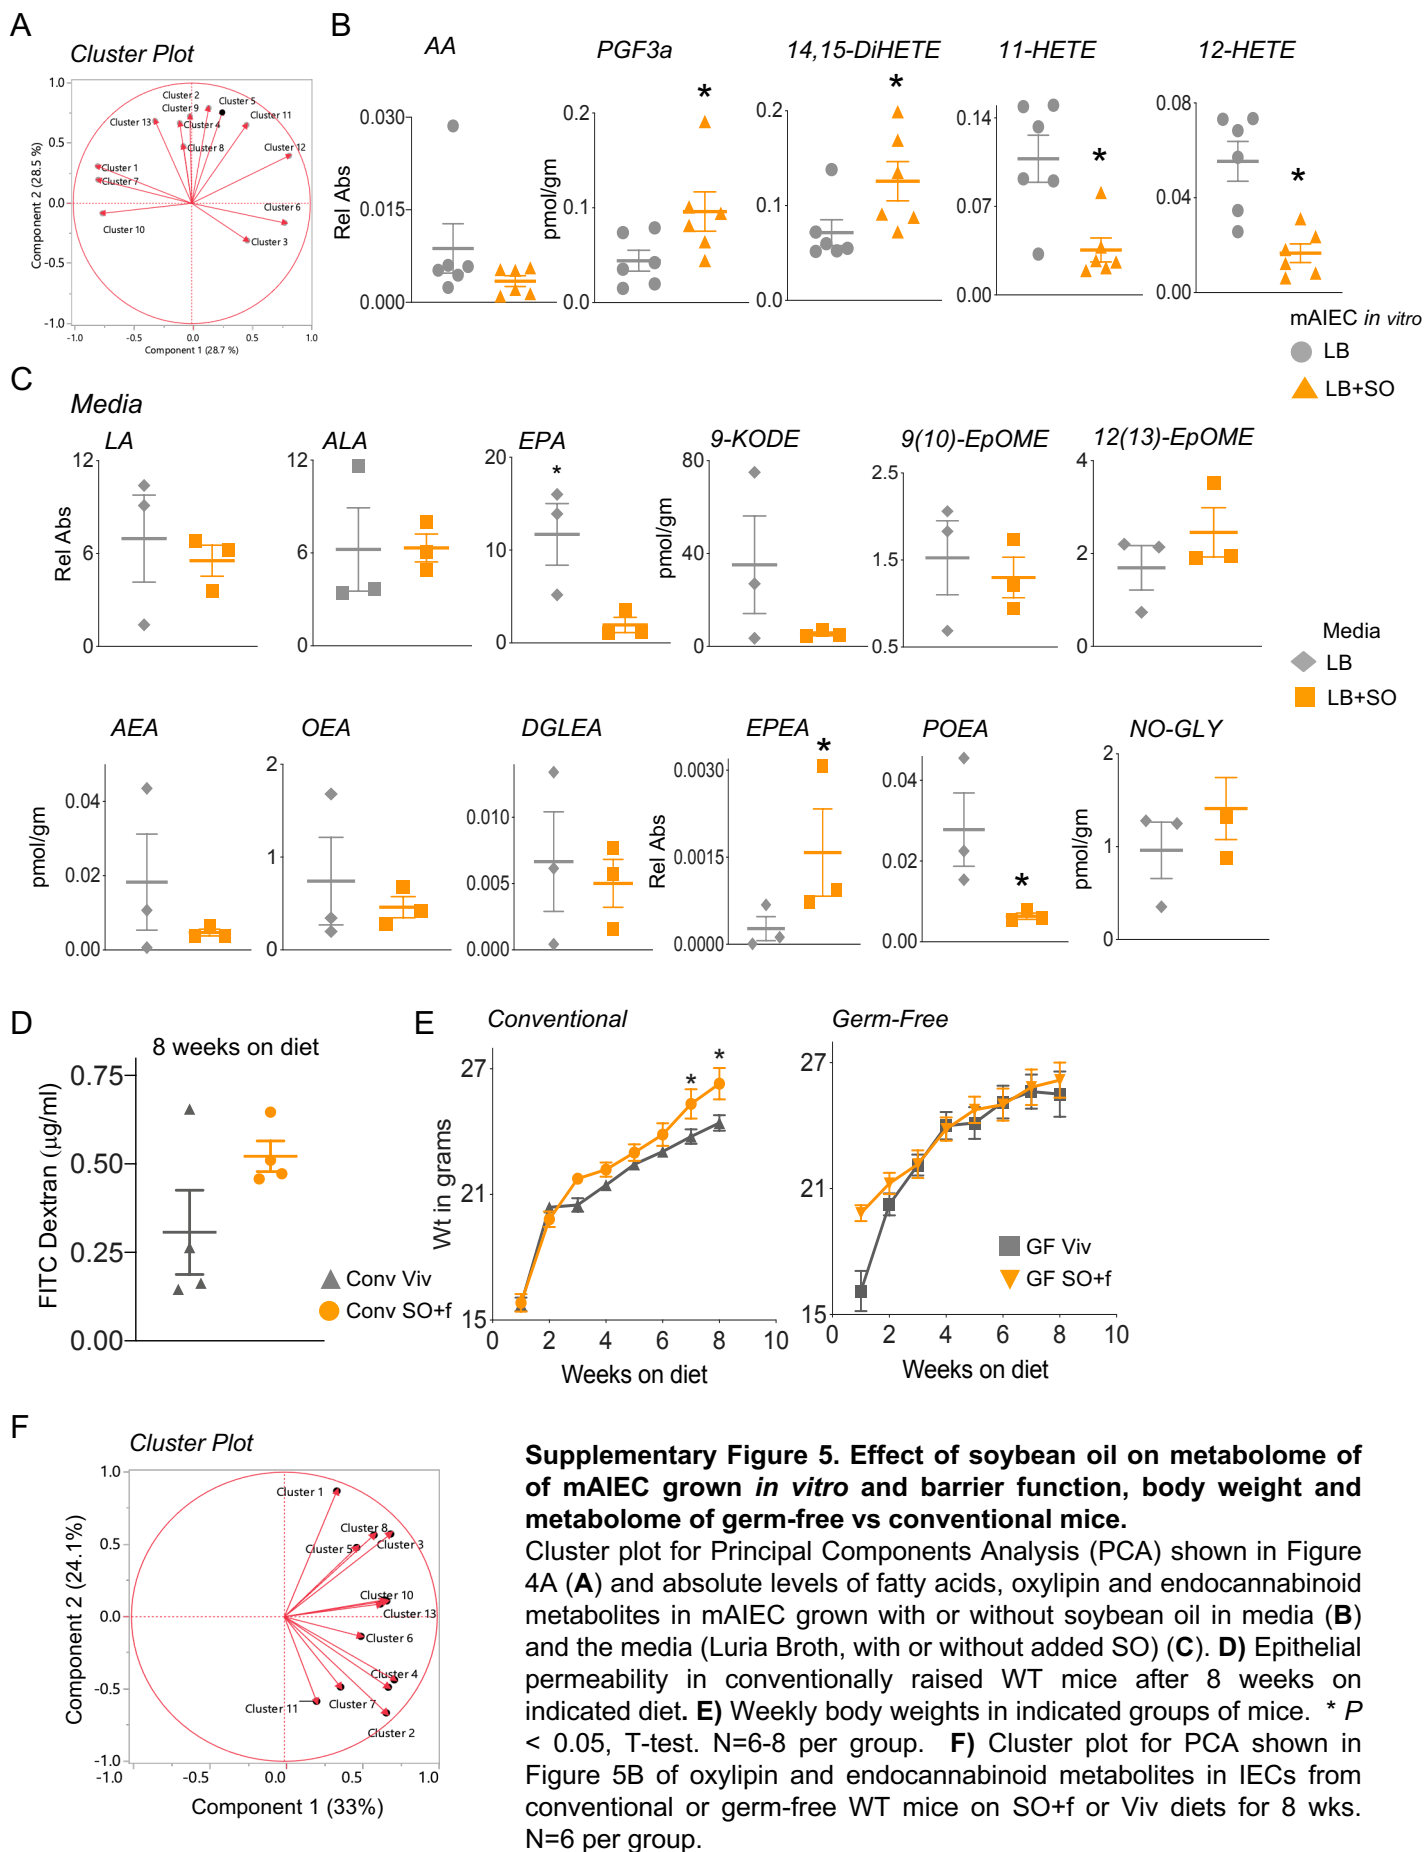

| Dysregulated Metabolites in SO+f vs Viv chow in Conv mice only |
|----------------------------------------------------------------|
| 13-HODE                                                        |
| 13-HOTE                                                        |
| 13-KODE                                                        |
| PGF2a                                                          |
| 8,9-DiHETrE                                                    |
| 11,12-DiHETrE                                                  |

| Dysregulated Metabolites in SO+f vs Viv chow in Conv and GF mice |               |              |
|------------------------------------------------------------------|---------------|--------------|
| 12-HETE                                                          | 12-HEPE       | 5, 6-DiHETrE |
| 2-LG                                                             | 14,15-DiHETE  | 5-HEPE       |
| 8,15-DiHETE                                                      | 14,15-DiHETrE | 9-HEPE       |
| ALA                                                              | 15-HEPE       | DHEA         |
| LA                                                               | 17,18-DiHETE  | EPA          |
| 12,13-DiHODE                                                     | 19,20-DiHDoPA | EPEA         |
| 12,13-DiHOME                                                     | 4-HDoHE       | POEA         |

| Dysregulated Metabolites in SO+f vs Viv chow in GF mice only |
|--------------------------------------------------------------|
| 14(15)-EpETrE                                                |
| 6-keto PGF1a                                                 |
| AA                                                           |
| aLEA                                                         |
| DGLEA                                                        |
| DHA                                                          |
| NA-Gly                                                       |
| PEA                                                          |
| PGF3a                                                        |

\* Red font- down in Viv chow fed mice

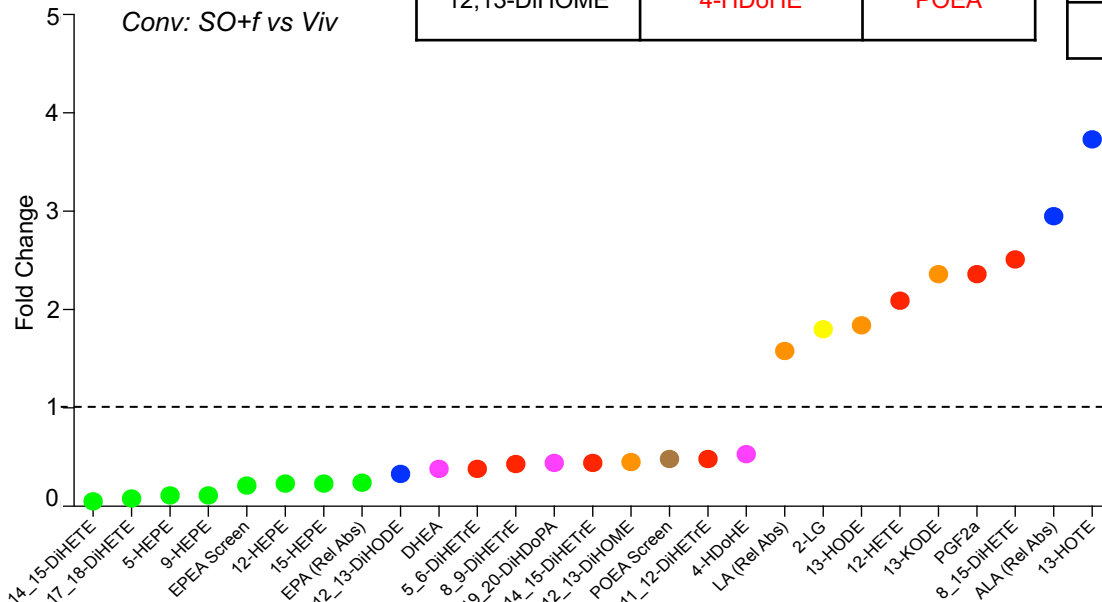

- ALA- alpha linoleic acid
- EPA- eicosapentenoic acid
- LA- linoleic acid
- AA- arachidonic acid
- POA- palmitoleic acid
- DHA- docosahexenoic acid
- OA- oleic acid
- LG- linoleoyl glycerol
- PA- palmitic acid
- DGLA- Dihomo- $\gamma$ -linolenic acid

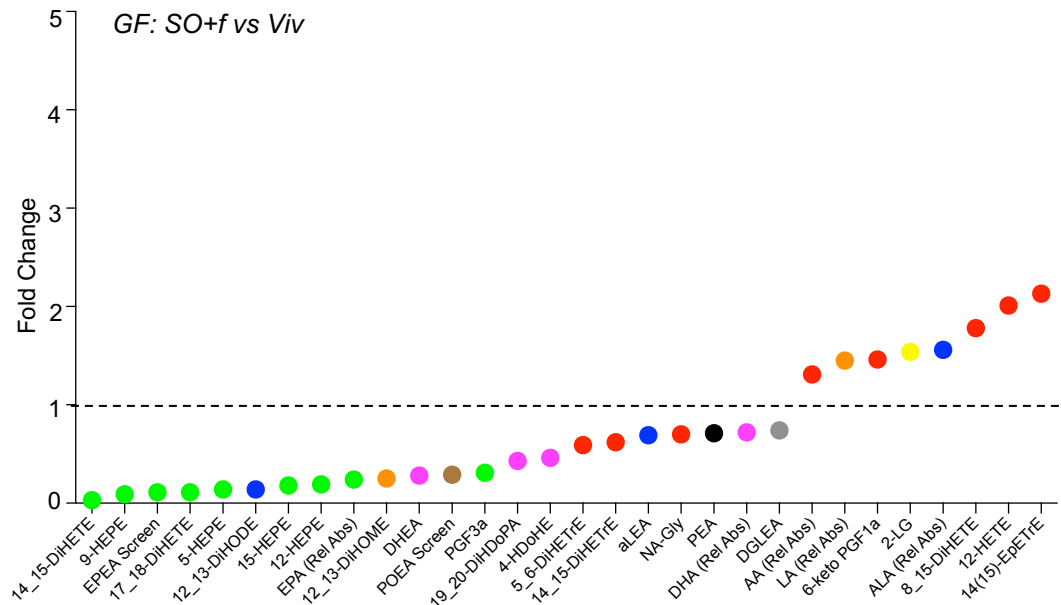

**Supplementary Figure 6.** Comparison of effect of diet on metabolite levels in IECs of conventional and germ-free mice.

| Dysregulated Metabolites in GF vs Conv in Viv chow only |               |        |
|---------------------------------------------------------|---------------|--------|
| 1-LG                                                    | 15, 16-DiHODE | 9-KODE |
| 11-HETE                                                 | 15(16)-EpODE  | DHEA   |
| 12,13-DiHODE                                            | 2-AG          | EPEA   |
| 12, 13-DiHOME                                           | 2-LG          | PEA    |
| 12(13)-Ep-9-KODE                                        | 2-OG          | PGF3a  |
| 12(13)-EpODE                                            | 9, 10-DiHODE  | POEA   |
| 13-HODE                                                 | 9-HODE        |        |
| 13-KODE                                                 | 9-HOTE        |        |

| Dysregulated Metabolites in GF vs Conv in Viv and SO+f |        |
|--------------------------------------------------------|--------|
| AEA                                                    | LA     |
| ALA                                                    | LEA    |
| aLEA                                                   | NA-Gly |
| DHA                                                    | OEA    |
| EPA                                                    | PGF2a  |
| F2 Isoprostanes                                        |        |

| Dysregulated Metabolites in GF vs Conv in SO+f only |
|-----------------------------------------------------|
| 11, 12-DiHETrE                                      |
| 17, 18-DiHETE                                       |
| 5, 6-DiHETrE                                        |
| 5-HEPE                                              |
| 8, 9-DiHETrE                                        |
| AA                                                  |
| NO-Gly                                              |

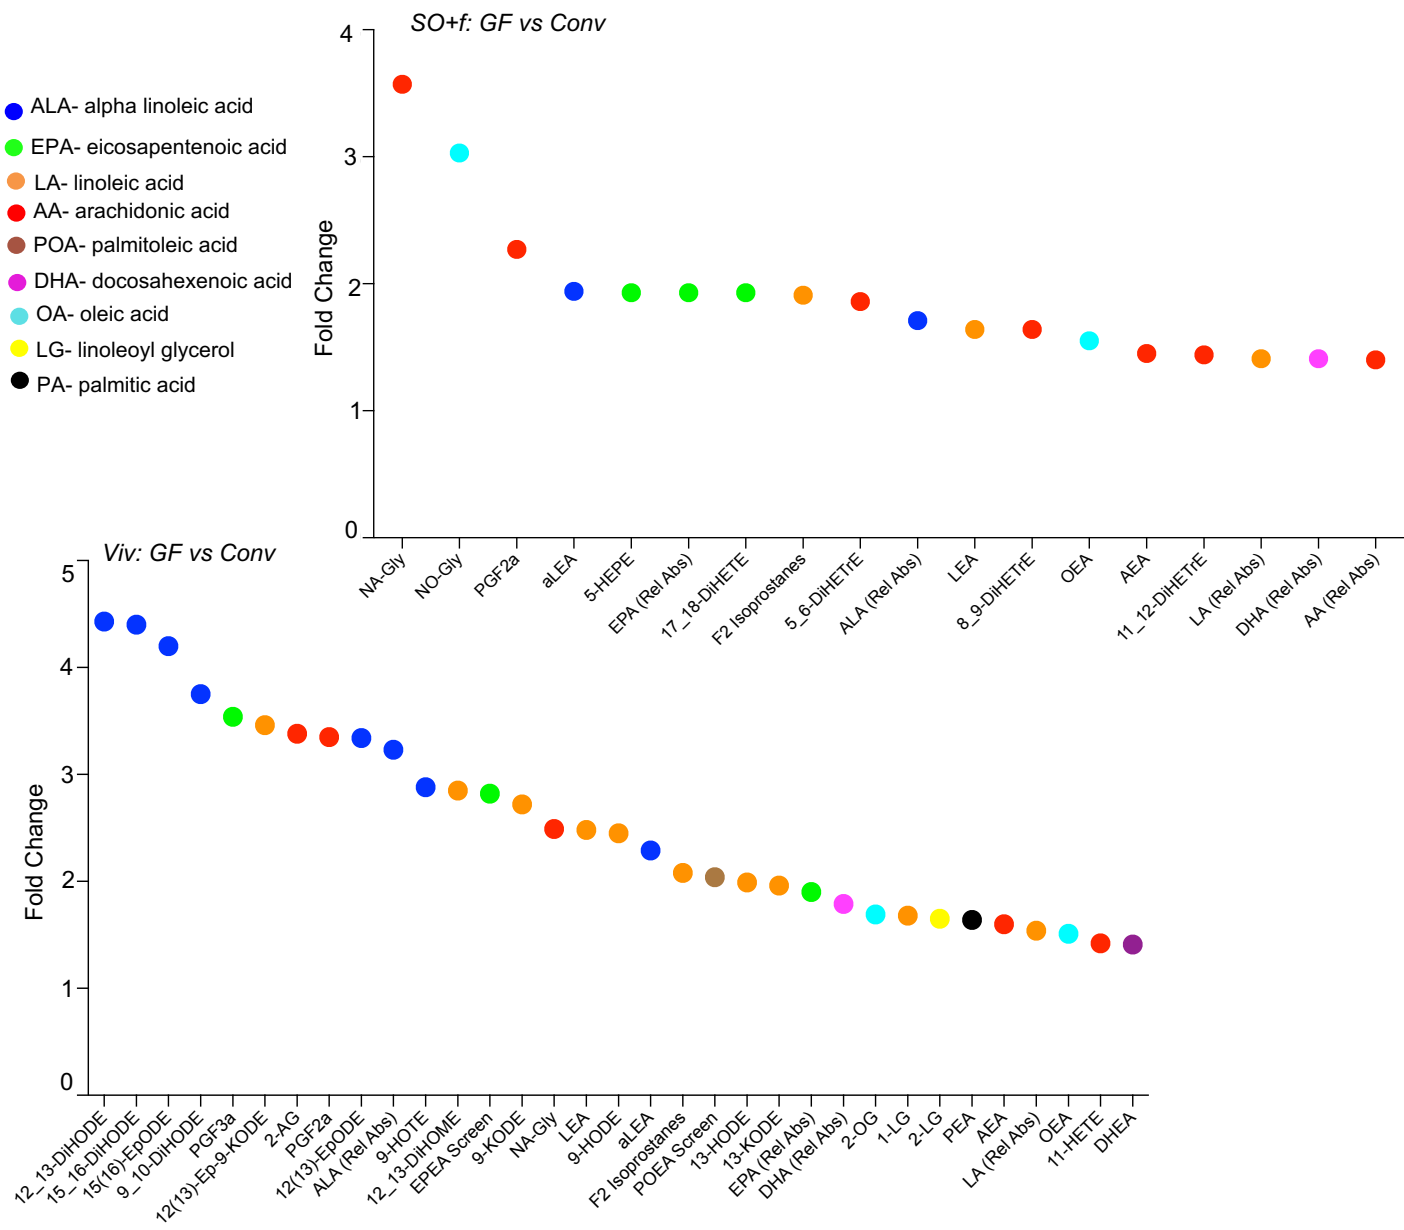

**Supplementary Figure 7.** Comparison of effect of microbiome on metabolite levels in IECs of conventional versus germ-free mice.
