# Supplementary material for: Diet High in Soybean Oil Increases Susceptibility to Colitis in Mice
Source: bioRxiv or medRxiv preprint supplement (doi:10.1101/2021.02.08.430328), 2022-08-30
Supplement: Supplementary file [file media-2.pdf]

**Supplementary Table 1.** Composition of diets and oils used in this study

|                    | <b>Viv Chow*</b> | <b>SO</b> | <b>SO+f</b> |
|--------------------|------------------|-----------|-------------|
| Protein (gm%)      | 23.9             | 19.5      | 16          |
| Carbohydrate (gm%) | 48.7             | 57.5      | 45.9        |
| Fat (gm%)          | 5                | 18.2      | 14.9        |
| kcal/gm            | 3.36             | 4.26      | 4.26        |
| Fat (kcal%)        | 13.4             | 35        | 35          |
| LA (kcal%)         | 4.5              | 19        | 18.6        |
| ALA (kcal%)        | 0                | 3         | 3           |
| Fiber (gm%)**      | 23.3             | 0         | 19.3        |

\* Purina Test Diet 5001

\*\* Viv chow fiber composed of cellulose, hemi-cellulose and lignin  
SO+f fiber comprised of cellulose + inulin
