# Supplementary material for: Diet High in Soybean Oil Increases Susceptibility to Colitis in Mice
Source: bioRxiv or medRxiv preprint supplement (doi:10.1101/2021.02.08.430328), 2022-08-30
Supplement: Supplementary file [file media-3.pdf]

Supplementary Table 2

| Variable clusters Bacterial Cells |         |                 |                          |                           |                 |
|-----------------------------------|---------|-----------------|--------------------------|---------------------------|-----------------|
| Sample Type                       | Cluster | Members         | RSquare with Own Cluster | RSquare with Next Closest | 1-RSquare Ratio |
| Bacterial Cells                   | 1       | 9_10-DiHOME     | 0.906626                 | 0.512973                  | 0.191722        |
| Bacterial Cells                   | 1       | 15_16-DiHODE    | 0.944289                 | 0.710006                  | 0.19211         |
| Bacterial Cells                   | 1       | LEA             | 0.883                    | 0.511666                  | 0.23959         |
| Bacterial Cells                   | 1       | aLEA            | 0.902029                 | 0.675291                  | 0.301718        |
| Bacterial Cells                   | 1       | 9_10-DiHODE     | 0.86691                  | 0.64953                   | 0.379747        |
| Bacterial Cells                   | 1       | 9(10)-EpOME     | 0.805226                 | 0.74757                   | 0.771597        |
| Bacterial Cells                   | 1       | 19(20)-EpDPE    | 0.159232                 | 0.095182                  | 0.929213        |
| Bacterial Cells                   | 2       | PEA             | 0.967285                 | 0.615201                  | 0.085018        |
| Bacterial Cells                   | 2       | POEA Screen     | 0.96594                  | 0.603676                  | 0.085939        |
| Bacterial Cells                   | 2       | OEA             | 0.937456                 | 0.657869                  | 0.182808        |
| Bacterial Cells                   | 2       | NO-Gly          | 0.890425                 | 0.497788                  | 0.218184        |
| Bacterial Cells                   | 2       | EPEA Screen     | 0.866851                 | 0.58634                   | 0.32188         |
| Bacterial Cells                   | 2       | 11-HETE         | 0.754894                 | 0.43594                   | 0.434539        |
| Bacterial Cells                   | 2       | DGLEA           | 0.864874                 | 0.719162                  | 0.481154        |
| Bacterial Cells                   | 2       | 5-HETE          | 0.758132                 | 0.595025                  | 0.597241        |
| Bacterial Cells                   | 2       | NA-Gly          | 0.492387                 | 0.207715                  | 0.640695        |
| Bacterial Cells                   | 3       | 6-keto PGF1a    | 0.976571                 | 0.437839                  | 0.041677        |
| Bacterial Cells                   | 3       | 9_12_13-TriHOME | 0.965441                 | 0.400347                  | 0.057632        |
| Bacterial Cells                   | 3       | PGF2a           | 0.938897                 | 0.407262                  | 0.103086        |
| Bacterial Cells                   | 3       | F2 Isoprostanes | 0.869661                 | 0.369056                  | 0.206577        |
| Bacterial Cells                   | 3       | PGF3a           | 0.874899                 | 0.442648                  | 0.224455        |
| Bacterial Cells                   | 3       | 13-HOTE         | 0.655822                 | 0.457603                  | 0.63455         |
| Bacterial Cells                   | 3       | 13-HODE         | 0.841626                 | 0.75265                   | 0.640284        |
| Bacterial Cells                   | 3       | 20-HETE         | 0.273549                 | 0.20045                   | 0.908575        |
| Bacterial Cells                   | 4       | Protectin DX    | 0.725938                 | 0.234916                  | 0.358211        |
| Bacterial Cells                   | 4       | 17_18-DiHETE    | 0.751609                 | 0.344238                  | 0.378783        |
| Bacterial Cells                   | 4       | 15-HETE         | 0.667245                 | 0.281412                  | 0.463068        |
| Bacterial Cells                   | 4       | 9-HEPE          | 0.349149                 | 0.216536                  | 0.830736        |
| Bacterial Cells                   | 5       | 8(9)-EpETrE     | 0.786717                 | 0.27898                   | 0.295808        |
| Bacterial Cells                   | 5       | TXB2            | 0.643071                 | 0.202411                  | 0.44751         |
| Bacterial Cells                   | 5       | 14(15)-EpETrE   | 0.660693                 | 0.262271                  | 0.459934        |
| Bacterial Cells                   | 5       | 9-HETE          | 0.5677                   | 0.356394                  | 0.671684        |
| Bacterial Cells                   | 5       | 8-HETE          | 0.484255                 | 0.477413                  | 0.986908        |
| Bacterial Cells                   | 6       | AA (Rel Abs)    | 0.83082                  | 0.421447                  | 0.292419        |
| Bacterial Cells                   | 6       | 11_12-DiHETrE   | 0.856814                 | 0.586489                  | 0.34627         |
| Bacterial Cells                   | 6       | 14_15-DiHETrE   | 0.764845                 | 0.484742                  | 0.456383        |
| Bacterial Cells                   | 6       | 13-KODE         | 0.60674                  | 0.294281                  | 0.557247        |

|                 |    |                  |          |          |          |
|-----------------|----|------------------|----------|----------|----------|
| Bacterial Cells | 6  | 8_9-DiHETrE      | 0.596902 | 0.420374 | 0.695446 |
| Bacterial Cells | 7  | 1-OG             | 0.819295 | 0.331775 | 0.270426 |
| Bacterial Cells | 7  | 2-LG             | 0.808608 | 0.33538  | 0.287971 |
| Bacterial Cells | 7  | 9-HODE           | 0.86537  | 0.603589 | 0.339623 |
| Bacterial Cells | 7  | 2-OG             | 0.579798 | 0.221043 | 0.539442 |
| Bacterial Cells | 7  | 9-HOTE           | 0.616848 | 0.317756 | 0.561605 |
| Bacterial Cells | 7  | 12_13-DiHOME     | 0.670782 | 0.571468 | 0.768245 |
| Bacterial Cells | 8  | 14-HDoHE         | 0.822472 | 0.208579 | 0.224316 |
| Bacterial Cells | 8  | 2-AG             | 0.653198 | 0.127736 | 0.397588 |
| Bacterial Cells | 8  | 11(12)-EpETrE    | 0.647766 | 0.189471 | 0.434573 |
| Bacterial Cells | 8  | 12_13-DiHODE     | 0.6056   | 0.119629 | 0.447993 |
| Bacterial Cells | 9  | 4-HDoHE          | 0.699046 | 0.270543 | 0.412572 |
| Bacterial Cells | 9  | 15-KETE          | 0.638472 | 0.336234 | 0.544663 |
| Bacterial Cells | 9  | 15-HEPE          | 0.582673 | 0.253944 | 0.559377 |
| Bacterial Cells | 9  | 5-KETE           | 0.561807 | 0.267774 | 0.59844  |
| Bacterial Cells | 9  | 17-HDoHE         | 0.500923 | 0.194221 | 0.619373 |
| Bacterial Cells | 9  | DHEA             | 0.394053 | 0.19062  | 0.748656 |
| Bacterial Cells | 10 | ALA (Rel Abs)    | 0.933235 | 0.605091 | 0.169063 |
| Bacterial Cells | 10 | 15(16)-EpODE     | 0.920912 | 0.573918 | 0.185618 |
| Bacterial Cells | 10 | 12(13)-EpODE     | 0.828629 | 0.50936  | 0.34928  |
| Bacterial Cells | 10 | LA (Rel Abs)     | 0.839716 | 0.618282 | 0.419902 |
| Bacterial Cells | 10 | 12(13)-EpOME     | 0.899342 | 0.780397 | 0.458361 |
| Bacterial Cells | 10 | 9-KODE           | 0.726864 | 0.509641 | 0.557013 |
| Bacterial Cells | 10 | 9(10)-EpODE      | 0.754616 | 0.617225 | 0.641066 |
| Bacterial Cells | 10 | 14_15-DiHETE     | 0.246285 | 0.119544 | 0.856051 |
| Bacterial Cells | 10 | DHA (Rel Abs)    | 0.16516  | 0.095646 | 0.923134 |
| Bacterial Cells | 11 | AEA              | 0.83864  | 0.638085 | 0.445851 |
| Bacterial Cells | 11 | 12-HETE          | 0.748881 | 0.455765 | 0.461416 |
| Bacterial Cells | 11 | SEA              | 0.703941 | 0.416442 | 0.507334 |
| Bacterial Cells | 11 | 5-HEPE           | 0.478051 | 0.224365 | 0.672931 |
| Bacterial Cells | 11 | PGD2             | 0.588396 | 0.436041 | 0.729848 |
| Bacterial Cells | 12 | 12(13)-Ep-9-KODE | 0.747622 | 0.33525  | 0.379659 |
| Bacterial Cells | 12 | 5_6-DiHETrE      | 0.824166 | 0.616043 | 0.457951 |
| Bacterial Cells | 12 | EPA (Rel Abs)    | 0.59106  | 0.200726 | 0.511639 |
| Bacterial Cells | 13 | 8_15-DiHETE      | 0.845477 | 0.336379 | 0.232848 |
| Bacterial Cells | 13 | 19_20-DiHDoPA    | 0.81483  | 0.446656 | 0.334638 |
| Bacterial Cells | 13 | 12-HEPE          | 0.726216 | 0.27345  | 0.376827 |

## Variable clusters Intestinal Epithelial Cells

| Sample Type                 | Cluster | Members         | RSquare with Own Cluster | RSquare with Next Closest | 1-RSquare Ratio |
|-----------------------------|---------|-----------------|--------------------------|---------------------------|-----------------|
| Intestinal Epithelial Cells | 1       | 5-HEPE          | 0.973592681              | 0.580920145               | 0.063012618     |
| Intestinal Epithelial Cells | 1       | 17_18-DiHETE    | 0.920418922              | 0.504192367               | 0.160507974     |
| Intestinal Epithelial Cells | 1       | 9-HEPE          | 0.910420206              | 0.472688881               | 0.169880344     |
| Intestinal Epithelial Cells | 1       | EPA (Rel Abs)   | 0.918269859              | 0.683447922               | 0.258188611     |
| Intestinal Epithelial Cells | 1       | 19_20-DiHDoPA   | 0.883918694              | 0.577129028               | 0.274507624     |
| Intestinal Epithelial Cells | 1       | 14_15-DiHETE    | 0.840174068              | 0.464392517               | 0.29840123      |
| Intestinal Epithelial Cells | 1       | 12-HEPE         | 0.827879092              | 0.45918547                | 0.318262359     |
| Intestinal Epithelial Cells | 1       | DHEA            | 0.714554177              | 0.421073992               | 0.493060977     |
| Intestinal Epithelial Cells | 1       | 4-HDoHE         | 0.774757394              | 0.553496797               | 0.504459105     |
| Intestinal Epithelial Cells | 1       | 15-HEPE         | 0.704568915              | 0.489654665               | 0.578884659     |
| Intestinal Epithelial Cells | 1       | EPEA Screen     | 0.746314609              | 0.683023127               | 0.800327761     |
| Intestinal Epithelial Cells | 2       | 9-HETE          | 0.920886475              | 0.53239868                | 0.169190124     |
| Intestinal Epithelial Cells | 2       | 12-HETE         | 0.913666471              | 0.499908491               | 0.172635462     |
| Intestinal Epithelial Cells | 2       | 15-HETE         | 0.848379218              | 0.493676426               | 0.299454321     |
| Intestinal Epithelial Cells | 2       | 8-HETE          | 0.897372134              | 0.677974042               | 0.31869439      |
| Intestinal Epithelial Cells | 2       | 9_12_13-TriHOME | 0.729269678              | 0.363569501               | 0.425388668     |
| Intestinal Epithelial Cells | 2       | 6-keto PGF1a    | 0.514380613              | 0.3541506                 | 0.751908087     |
| Intestinal Epithelial Cells | 2       | 11-HETE         | 0.697774664              | 0.638084232               | 0.835070927     |
| Intestinal Epithelial Cells | 3       | 12_13-DiHOME    | 0.92397835               | 0.565286683               | 0.174877665     |
| Intestinal Epithelial Cells | 3       | 15_16-DiHODE    | 0.940190106              | 0.667809971               | 0.180047227     |
| Intestinal Epithelial Cells | 3       | 12_13-DiHODE    | 0.900092545              | 0.551055862               | 0.222538723     |
| Intestinal Epithelial Cells | 3       | 12(13)-EpODE    | 0.88326091               | 0.61066305                | 0.299840769     |
| Intestinal Epithelial Cells | 3       | 9_10-DiHOME     | 0.894605269              | 0.766995243               | 0.452328667     |
| Intestinal Epithelial Cells | 3       | aLEA            | 0.799202813              | 0.625910959               | 0.536763083     |
| Intestinal Epithelial Cells | 3       | 12(13)-EpOME    | 0.789860065              | 0.649441371               | 0.599443053     |
| Intestinal Epithelial Cells | 3       | 15(16)-EpODE    | 0.854805939              | 0.76723034                | 0.62376712      |
| Intestinal Epithelial Cells | 3       | LEA             | 0.738268597              | 0.602182321               | 0.657917979     |
| Intestinal Epithelial Cells | 4       | 2-LG            | 0.903558791              | 0.516768019               | 0.199575385     |
| Intestinal Epithelial Cells | 4       | ALA (Rel Abs)   | 0.92140589               | 0.669282256               | 0.237647092     |
| Intestinal Epithelial Cells | 4       | 2-OG            | 0.845113561              | 0.44494804                | 0.27904854      |
| Intestinal Epithelial Cells | 4       | 13-KODE         | 0.78707186               | 0.47518442                | 0.405719929     |
| Intestinal Epithelial Cells | 4       | 9(10)-EpODE     | 0.82395167               | 0.653292075               | 0.50777129      |
| Intestinal Epithelial Cells | 4       | LA (Rel Abs)    | 0.696772343              | 0.420333021               | 0.523106659     |
| Intestinal Epithelial Cells | 4       | 1-OG            | 0.658206347              | 0.358051745               | 0.532431782     |
| Intestinal Epithelial Cells | 4       | 2-AG            | 0.513708284              | 0.36883349                | 0.770465016     |
| Intestinal Epithelial Cells | 4       | 13-HOTE         | 0.551859274              | 0.439896989               | 0.80010412      |
| Intestinal Epithelial Cells | 5       | 11_12-DiHETrE   | 0.862170325              | 0.273202148               | 0.189639629     |

|                             |    |                  |             |             |             |
|-----------------------------|----|------------------|-------------|-------------|-------------|
| Intestinal Epithelial Cells | 5  | 8_9-DiHETrE      | 0.8915705   | 0.540429558 | 0.235936626 |
| Intestinal Epithelial Cells | 5  | 14_15-DiHETrE    | 0.856585924 | 0.439822754 | 0.256015532 |
| Intestinal Epithelial Cells | 5  | 5_6-DiHETrE      | 0.80231571  | 0.64116354  | 0.550903581 |
| Intestinal Epithelial Cells | 5  | DGLEA            | 0.488604167 | 0.24999558  | 0.681857092 |
| Intestinal Epithelial Cells | 6  | PGF2a            | 0.949086967 | 0.173564856 | 0.061605601 |
| Intestinal Epithelial Cells | 6  | F2 Isoprostanes  | 0.907707429 | 0.169405189 | 0.111116239 |
| Intestinal Epithelial Cells | 6  | AEA              | 0.703267552 | 0.317742916 | 0.434927618 |
| Intestinal Epithelial Cells | 7  | 8(9)-EpETrE      | 0.78916667  | 0.379216409 | 0.339624522 |
| Intestinal Epithelial Cells | 7  | 5-HETE           | 0.684982027 | 0.357936948 | 0.490634015 |
| Intestinal Epithelial Cells | 7  | AA (Rel Abs)     | 0.700666722 | 0.439095693 | 0.533661935 |
| Intestinal Epithelial Cells | 7  | 15-KETE          | 0.775343535 | 0.603797871 | 0.567024881 |
| Intestinal Epithelial Cells | 8  | DHA (Rel Abs)    | 0.853382385 | 0.426468381 | 0.255639986 |
| Intestinal Epithelial Cells | 8  | PEA              | 0.68429204  | 0.396197787 | 0.522866518 |
| Intestinal Epithelial Cells | 8  | NA-Gly           | 0.662258962 | 0.386177505 | 0.550225906 |
| Intestinal Epithelial Cells | 8  | OEA              | 0.664043077 | 0.441453611 | 0.60148437  |
| Intestinal Epithelial Cells | 8  | 12(13)-Ep-9-KODE | 0.453280363 | 0.268477625 | 0.747372405 |
| Intestinal Epithelial Cells | 8  | POEA Screen      | 0.66787905  | 0.593420077 | 0.816865101 |
| Intestinal Epithelial Cells | 8  | PGF3a            | 0.533978838 | 0.456445208 | 0.857358208 |
| Intestinal Epithelial Cells | 9  | 14-HDoHE         | 0.856046865 | 0.49833783  | 0.286952344 |
| Intestinal Epithelial Cells | 9  | Protectin DX     | 0.673559071 | 0.258378442 | 0.440171845 |
| Intestinal Epithelial Cells | 9  | 17-HDoHE         | 0.677931551 | 0.349408467 | 0.495039411 |
| Intestinal Epithelial Cells | 9  | PGD2             | 0.470643344 | 0.290228556 | 0.74581284  |
| Intestinal Epithelial Cells | 10 | 9-HODE           | 0.95796581  | 0.711174679 | 0.145534989 |
| Intestinal Epithelial Cells | 10 | 9-HOTE           | 0.942714302 | 0.639758073 | 0.159020076 |
| Intestinal Epithelial Cells | 10 | 9-KODE           | 0.926354464 | 0.657207591 | 0.214840043 |
| Intestinal Epithelial Cells | 10 | 13-HODE          | 0.864239634 | 0.624731115 | 0.361768246 |
| Intestinal Epithelial Cells | 10 | 9_10-DiHODE      | 0.887228359 | 0.754002703 | 0.458426341 |
| Intestinal Epithelial Cells | 10 | 9(10)-EpOME      | 0.697638035 | 0.533761192 | 0.648513079 |
| Intestinal Epithelial Cells | 11 | 8_15-DiHETE      | 0.757904236 | 0.277652896 | 0.335151568 |
| Intestinal Epithelial Cells | 11 | TXB2             | 0.654674685 | 0.228220005 | 0.447440096 |
| Intestinal Epithelial Cells | 11 | 20-HETE          | 0.706767551 | 0.391847598 | 0.48216935  |
| Intestinal Epithelial Cells | 12 | 11(12)-EpETrE    | 0.733281757 | 0.20105369  | 0.333837505 |
| Intestinal Epithelial Cells | 12 | 5-KETE           | 0.648814954 | 0.277614027 | 0.486145993 |
| Intestinal Epithelial Cells | 12 | 14(15)-EpETrE    | 0.538408158 | 0.224756241 | 0.595415102 |
| Intestinal Epithelial Cells | 12 | 19(20)-EpDPE     | 0.395120543 | 0.152448095 | 0.713678364 |
| Intestinal Epithelial Cells | 13 | SEA              | 0.810286631 | 0.234359881 | 0.247783997 |
| Intestinal Epithelial Cells | 13 | NO-Gly           | 0.810286631 | 0.308207058 | 0.274234322 |
